# Supplementary material for: Synthesis and Experimental Validation of New PDI Inhibitors with Antiproliferative Activity
Source: Hindawi journal article supplement (doi:10.1155/2017/2370359), 2017-01-01

## DTP1

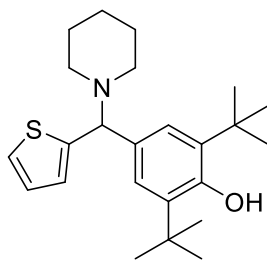

**Chemical Formula:** C<sub>24</sub>H<sub>35</sub>NOS

**Molecular Weight:** 385.61

### HRMS (Direct injection):

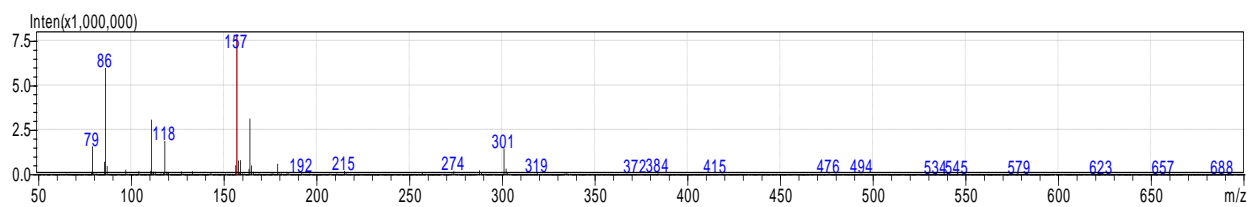

MS: m/z 384 [M-H]<sup>-</sup>

MS: m/z 301 [M - piperidinyl]<sup>-</sup>

MS: m/z 157 [DMSO]

# <sup>1</sup>H NMR (DMSO)

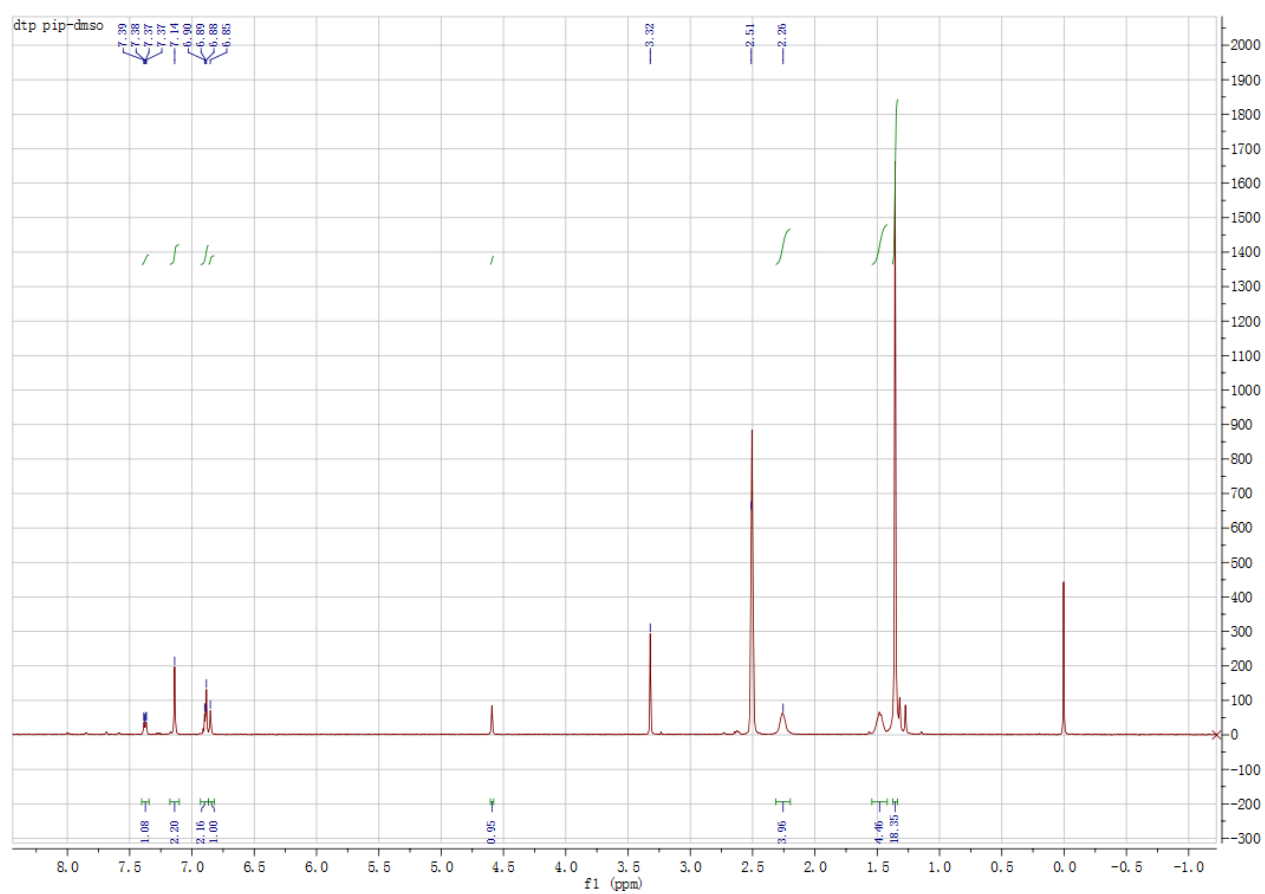

# <sup>13</sup>CNMR (CDCl<sub>3</sub>)

Current Data Parameters  
NAME C13 DTPpiperidina solido  
EXPNO 1  
PROCNO 1

F2 - Acquisition Parameters  
Date 20150921  
Time 11.48  
INSTRUM AV300  
PROBHD 5 mm BBO BB-1H  
PULPROG zgpg  
TD 32768  
SOLVENT CDCl<sub>3</sub>  
NS 512  
DS 2  
SWH 17985.611 Hz  
FIDRES 0.548877 Hz  
AQ 0.9110004 sec  
RG 5792.6  
DW 27.800 usec  
DE 6.00 usec  
TE 300.0 K  
D1 4.00000000 sec  
d11 0.03000000 sec  
d12 0.00002000 sec

===== CHANNEL f1 =====  
NUC1 13C  
P1 7.75 usec  
PL1 -3.00 dB  
SF01 75.4752953 MHz

===== CHANNEL f2 =====  
CPDPRG2 waltz16  
NUC2 1H  
PCPD2 80.00 usec  
PL2 -3.00 dB  
PL12 17.50 dB  
PL13 17.50 dB  
SF02 300.1312005 MHz

F2 - Processing parameters  
SI 32768  
SF 75.4677509 MHz  
WDW no  
SSB 0  
LB 0.00 Hz  
GB 0  
PC 1.40

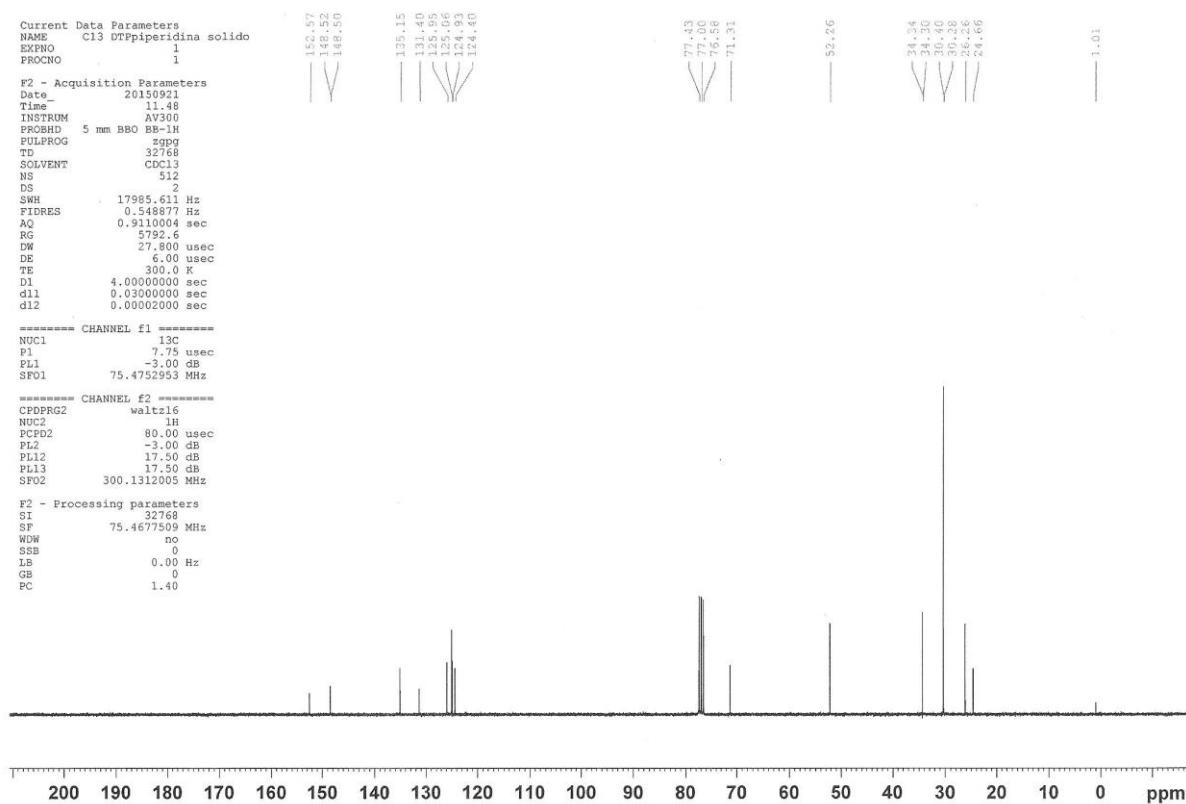

## GC-MS:

File : D:\MASSA\GAROFALO\DTPI.D  
Operator : Francesca  
Acquired : 6 Oct 2015 12:46 using AcqMethod STANDARD  
Instrument : Instrumen  
Sample Name: DTP piperidin xxx  
Misc Info : Metanolo  
Vial Number: 1

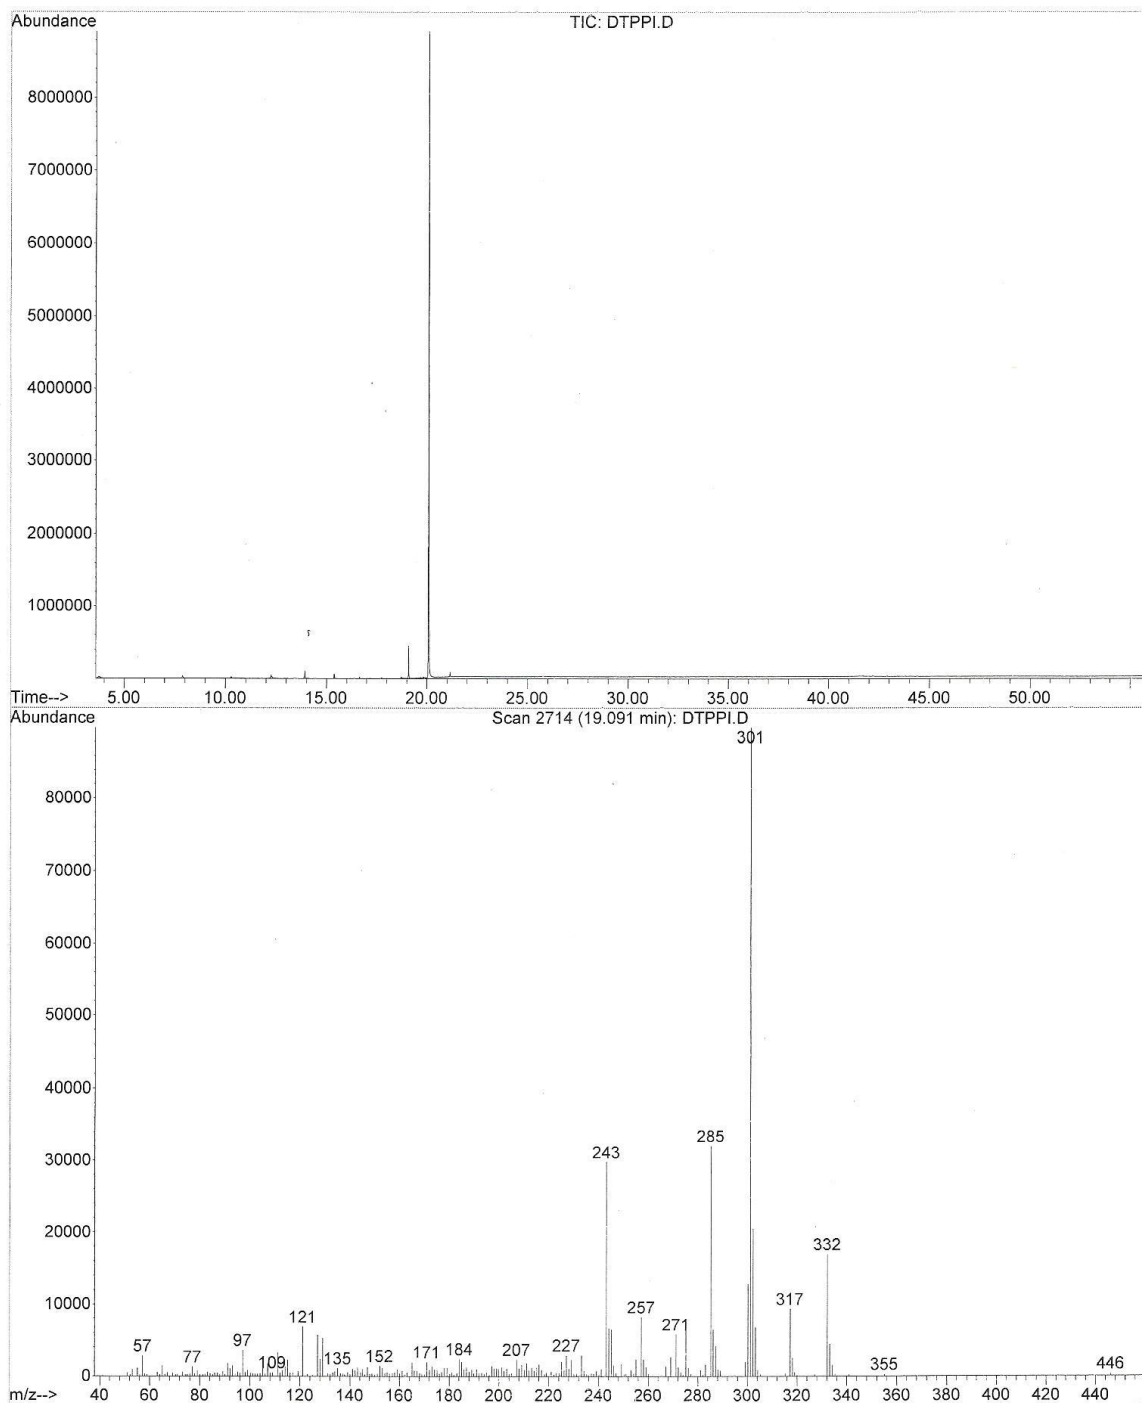

## DTP2

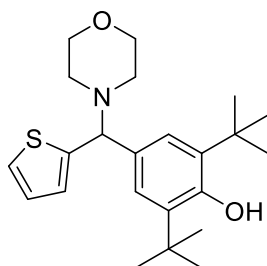

**Chemical Formula:** C<sub>23</sub>H<sub>33</sub>NO<sub>2</sub>S

**Molecular Weight:** 387.58

### HRMS (Direct injection):

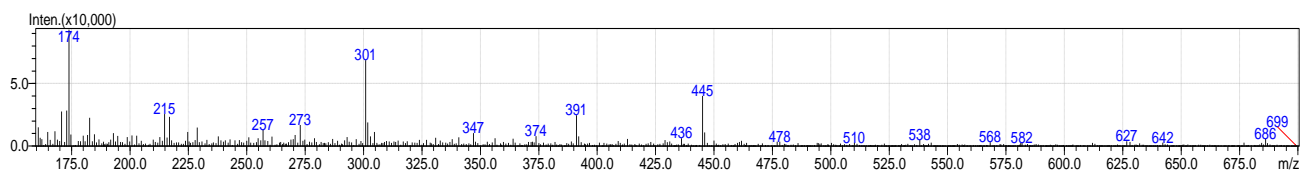

MS: m/z 301 [M - morpholino]<sup>-</sup>

### LC-MS:

Datafile Name: DTP Morf.\_Mary's compounds 20160226\_2262016\_005.lcd  
Sample Name: DTP Morf.  
Sample ID: DTP Morf.

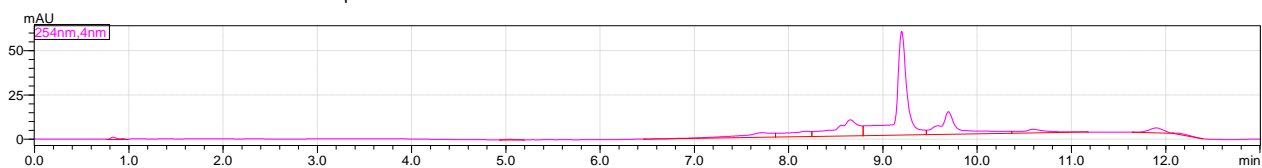

# $^1\text{H}$ NMR (DMSO)

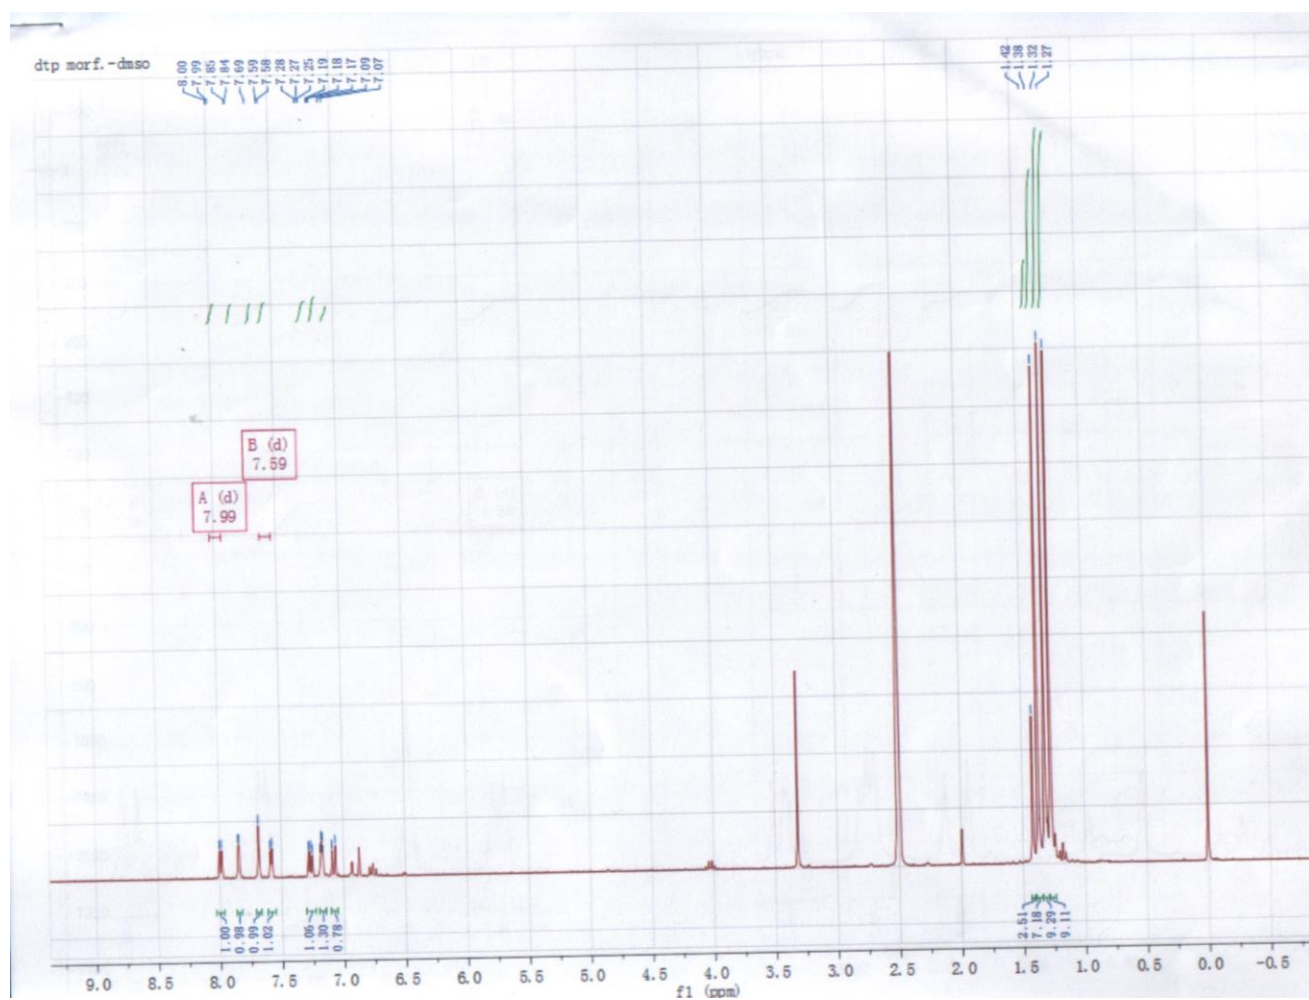

**Current Data Parameters**

|        |                    |
|--------|--------------------|
| NAME   | C13 DTP morfollina |
| EXPRO  | 1                  |
| PROCNO | 1                  |

  

**F2 - Acquisition Parameters**

|         |                   |
|---------|-------------------|
| Date_   | 20151020          |
| Time    | 18.19             |
| INSTRUM | AQ500             |
| PROBHD  | 5 mm BBO BB-HL    |
| PULPRG  | sppg              |
| TD      | 32768             |
| SOLVENT | CDCl <sub>3</sub> |
| NS      | 1024              |
| DS      | 2                 |
| SWH     | 17985.611 Hz      |
| FTRES   | 0.548877 Hz       |
| AQ      | 0.9110004 sec     |
| RJ      | 5792.6            |
| DW      | 27.800 usec       |
| DE      | 6.00 usec         |
| TE      | 300.0 K           |
| D1      | 4.00000000 sec    |
| d11     | 0.03000000 sec    |
| d12     | 0.00000000 sec    |

  

===== CHANNEL f1 =====

|      |                 |
|------|-----------------|
| NUC1 | <sup>13</sup> C |
| E1   | 7.75 usec       |
| PL1  | -3.00 dB        |
| SFO1 | 75.4752953 MHz  |

  

===== CHANNEL f2 =====

|         |                 |
|---------|-----------------|
| GPDPRG2 | waltz16         |
| NUC2    | <sup>1</sup> H  |
| PCPD2   | 80.00 usec      |
| FL2     | -3.00 dB        |
| PL12    | 17.50 dB        |
| PL13    | 17.50 dB        |
| SFO2    | 300.1312005 MHz |

  

**F2 - Processing parameters**

|     |                |
|-----|----------------|
| SI  | 32768          |
| SF  | 75.4677509 MHz |
| MWR | no             |
| SSB | 0              |
| LX  | 0.00 Hz        |
| GB  | 0              |
| PC  | 1.40           |

### DTP3

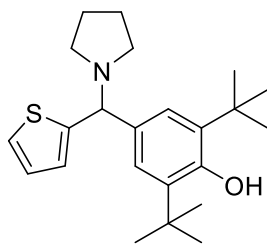

**Chemical Formula:** C<sub>23</sub>H<sub>33</sub>NOS

**Molecular Weight:** 371.58

### HRMS (Direct injection):

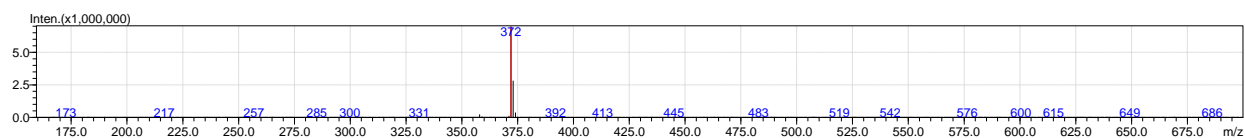

MS: m/z 372 [M+H]<sup>+</sup>

### LC-MS:

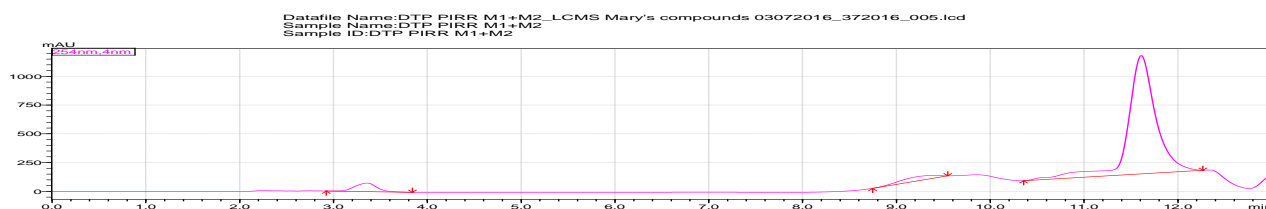



# <sup>1</sup>H NMR (DMSO)

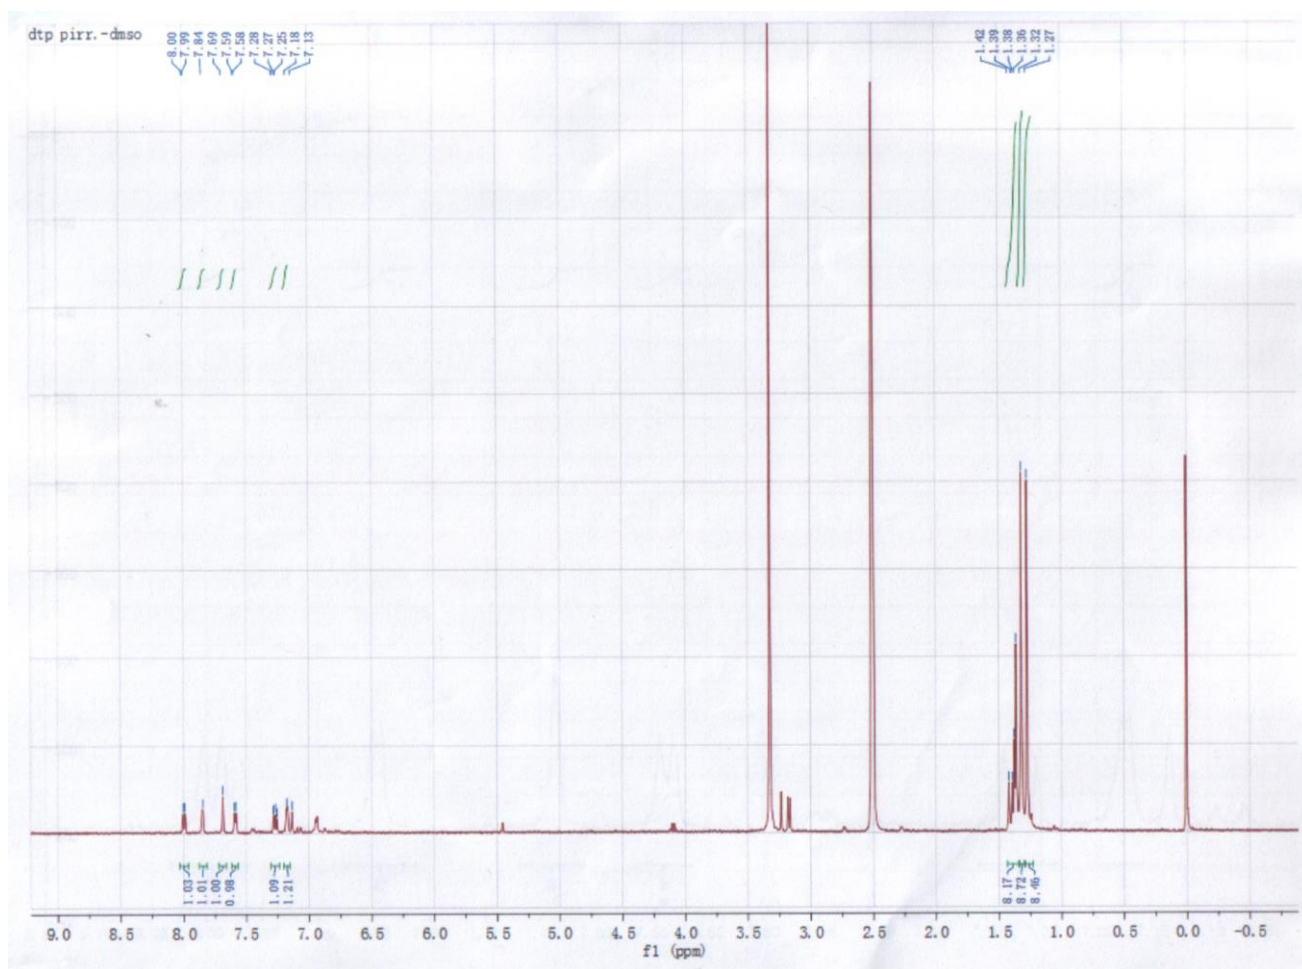

## GC-MS:

File : D:\MASSA\GAROFALO\MAR16.D  
Operator : Francesca  
Acquired : 9 Nov 2015 12:01 using AcqMethod STANDARD  
Instrument : Instrumen  
Sample Name: DTP Pirrolidina M2  
Misc Info : Metanolo  
Vial Number: 1

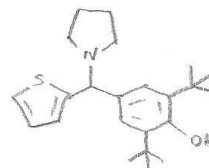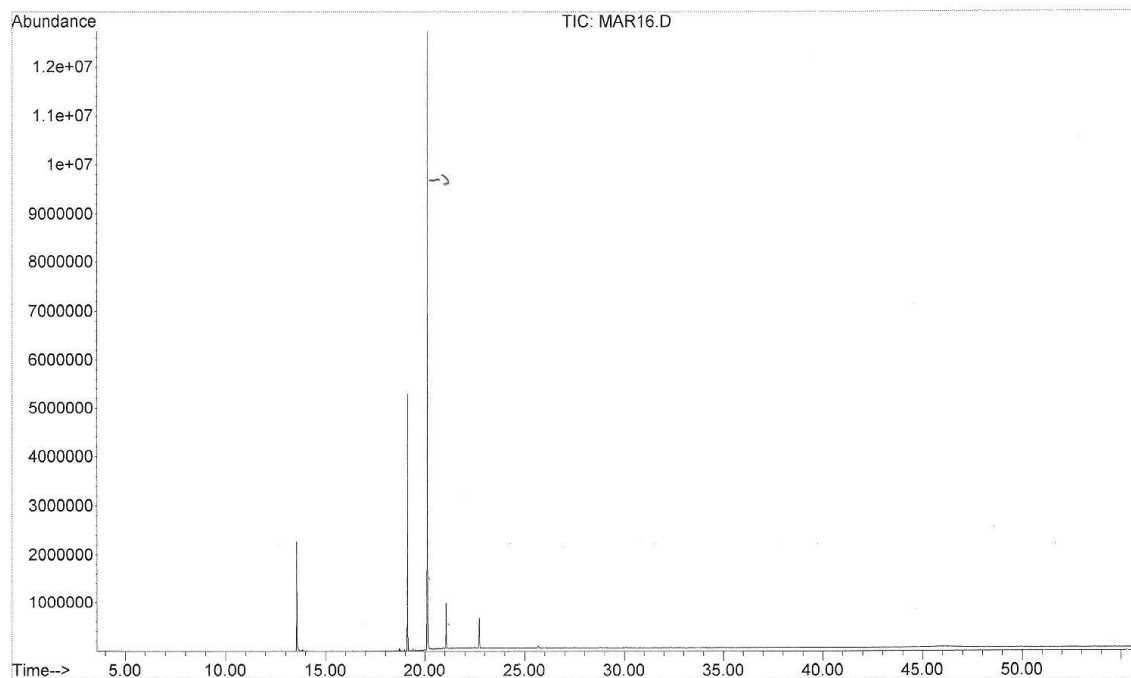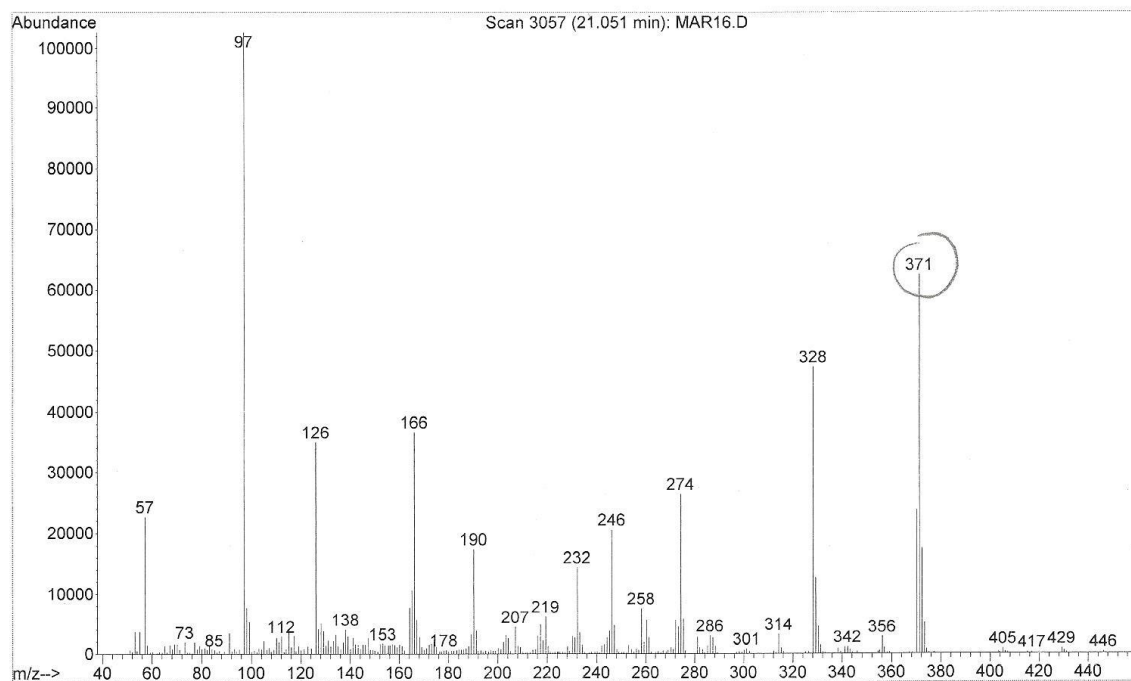

Supplement: f1 [file 2370359.f1.pdf]
